# Supplementary material for: Vertically aligned multi walled carbon nanotubes prevent biofilm formation of medically relevant bacteria
Source: Royal Society of Chemistry journal article supplement (doi:10.1039/c6tb00942e), 2016-01-01
Supplement: c6tb00942e1.pdf [file c6tb00942e1.pdf]

## Electronic Supplementary Information Malek *et al.*, 2016

Table S1: Live/dead ratio (relative amounts) was calculated for the conditions: formation on glass and on CNT of different length. The ratios were calculated based on the determined biofilm volume of dead and living cells respectively. Please notice, the absolute numbers of bacteria attached were significantly lower on CNTs than on glass.

|           | Surface | <i>K.oxytoca</i> | <i>P.aeruginosa</i> | <i>S.epidermidis</i> | <i>K.pneumoniae</i><br>Isolate |
|-----------|---------|------------------|---------------------|----------------------|--------------------------------|
| Short CNT | Glass   | 3.9              | 1.4                 | 1.1                  | 14.6                           |
|           | CNT     | 20.7             | 25.1                | 2.0                  | 10.6                           |
| Long CNT  | Glass   | 2.4              | 1.4                 | 1.9                  |                                |
|           | CNT     | 2.0              | 1.0                 | 30.7                 |                                |

Table S2: Maximum thickness of the biofilms formed on glass and CNT was compared via *t*-test. The *P* values are listed.

| Thickness | <i>K.oxytoca</i> | <i>P.aeruginosa</i> | <i>S.epidermidis</i> | <i>K.pneumoniae</i><br>isolate |
|-----------|------------------|---------------------|----------------------|--------------------------------|
| Short CNT | 0.0159           | 0.0079              | 0.0079               | 0.4571                         |
| Long CNT  | 0.0286           | 0.0079              | 0.0079               |                                |

Table S3: Volume of the biofilms developed on glass and CNT was compared via *t*-test. The *P* values are listed.

| Volume    | <i>K.oxytoca</i> | <i>P.aeruginosa</i> | <i>S.epidermidis</i> | <i>K.pneumoniae</i><br>isolate |
|-----------|------------------|---------------------|----------------------|--------------------------------|
| Short CNT | 0.0159           | 0.4127              | 0.0159               | 0.0357                         |
| Long CNT  | 0.0159           | 0.0079              | 0.0079               |                                |
